# Supplementary material for: British wind farm ESS attachments: curtailment reduction vs. price arbitrage
Source: Royal Society of Chemistry journal article supplement (doi:10.1039/d3ee01355c), 2023-01-01
Supplement: d3ee01355c1.pdf [file d3ee01355c1.pdf]

## Supplementary Information:

### British Wind Farm Battery Attachments: Curtailment Reduction vs Price Arbitrage

John Atherton<sup>1,2</sup>, Jethro Akroyd<sup>1,2</sup>, Feroz Farazi<sup>1</sup>,  
Sebastian Mosbach<sup>1,2</sup>, Mei Qi Lim<sup>1,2</sup>, Markus Kraft<sup>1,2,3,4</sup>

<sup>1</sup> Department of Chemical Engineering  
and Biotechnology  
University of Cambridge  
Philippa Fawcett Drive  
Cambridge, CB3 0AS  
United Kingdom

<sup>2</sup> CARES  
Cambridge Centre for Advanced  
Research and Education in Singapore  
1 Create Way  
CREATE Tower, #05-05  
Singapore, 138602

<sup>3</sup> School of Chemical  
and Biomedical Engineering  
Nanyang Technological University  
62 Nanyang Drive  
Singapore, 637459

<sup>4</sup> The Alan Turing Institute  
London  
United Kingdom

\* Corresponding author, e-mail address: [mk306@cam.ac.uk](mailto:mk306@cam.ac.uk)

Contents

A Appendix 2

A.1 Wind Farm Locations . . . . . 2

A.2 Background Factors for Returns . . . . . 3

A.3 Emissions Intensity by Site . . . . . 5

A.4 Example Run . . . . . 8

A.5 Further Curtailment Details . . . . . 10

References 14

## A Appendix

Additional information which may be of interest may be found herein.

### A.1 Wind Farm Locations

The locations of the selected 47 wind farms, including their GPS coordinates and countries, are listed below in Table S1.

| Farm Name            | EIC               | MW    | Country  | GPS (lat, lon)     |
|----------------------|-------------------|-------|----------|--------------------|
| Aberdeen             | 48WSTN0000ABRBON  | 96.8  | Scotland | 57.21666, -1.98333 |
| Arcleoch             | 48WSTN0000ARCHW6  | 120   | Scotland | 55.05333, -4.88222 |
| Baillie              | 48WSTN1000BABAWQ  | 52.5  | Scotland | 58.56441, -3.68027 |
| Barrow               | 48WSTN0000BOWLWY  | 90    | England  | 53.98333, -3.28333 |
| Beatrice             | 48WSTN0000BEATOG  | 273   | Scotland | 58.30263, -2.96229 |
| Beinneun             | 48WSTN0000BEINWN  | 108.8 | Scotland | 57.19552, -4.85579 |
| Berry Burn           | 48WSTN0000BRYBW4  | 67    | Scotland | 57.48712, -3.54822 |
| Bhlaraidh            | 48WSTN0000BHLAWZ  | 108   | Scotland | 57.22302, -4.66879 |
| Black Law            | 48WSTN00000BLLAV  | 124.2 | Scotland | 55.76694, -3.73888 |
| Black Law II         | 48WSTN00000BLLXM  | 63.43 | Scotland | 55.78093, -3.76413 |
| Blackcraig           | 48WSTN0000BLKWWR  | 52.9  | Scotland | 55.33309, -4.14217 |
| Braes of Doune       | 48WSTN0000BRDUWV  | 72    | Scotland | 56.27611, -4.0625  |
| Burbo Extension      | 48WSTN0000BRBEOT  | 259   | England  | 53.48333, -3.16666 |
| Clyde (Central)      | 48WSTN0000CLDCWZ  | 195.9 | Scotland | 55.46722, -3.65444 |
| Clyde (North)        | 48WSTN0000CLDNW2  | 197.7 | Scotland | 55.46722, -3.65444 |
| Clyde (South)        | 48WSTN0000CLDSWO  | 128.8 | Scotland | 55.46722, -3.65444 |
| Corriegarth          | 48WSTN0000CGTHWI  | 69    | Scotland | 57.21996, -4.4985  |
| Crystal Rig II       | 48WSTN0000CRYRBT  | 138   | Scotland | 55.9, -2.55218     |
| Dersalloch           | 48WSTN0000DRSLWN  | 69    | Scotland | 55.31915, -4.47189 |
| Dudgeon 1            | 48WSTN0000DDGNO3  | 108   | England  | 53.249, 1.38781    |
| Dunmaglass           | 48WSTN0000DUNGW6  | 94.05 | Scotland | 57.27718, -4.27231 |
| East Anglia One      | 48WSTN0000EAAOS   | 714   | England  | 52.90778, 2.62861  |
| Fallago Rig          | 48WSTN0000FALGWS  | 144   | Scotland | 55.83334, -2.74208 |
| Galawhistle          | 48WSTN0000GLWSWZ  | 55.2  | Scotland | 55.53429, -3.92416 |
| Greater Gabbard      | 48WSTN0000GRGBW9  | 504   | England  | 51.88, 1.94        |
| Griffin              | 48WSTN0000GRIFWQ  | 188.6 | Scotland | 56.61846, -3.87531 |
| Gunfleet Sands 1 & 2 | 48WSTN0000GNFSWJ  | 172.8 | England  | 51.73944, 1.17444  |
| Hadyard Hill         | 48WSTN0000HADHW8  | 119.8 | Scotland | 55.24583, -4.72305 |
| Harestanes           | 48WSTN0000HRSTWC  | 136   | Scotland | 55.21669, -3.71962 |
| Hornsea 1            | 48WSTN0000HOWAOA  | 1218  | England  | 51.63333, 1.48333  |
| Humber Gateway       | 48WSTN0000HMGTOR  | 219   | England  | 53.644, 0.293      |
| Kilbraur             | 48WSTN0000KILBWA  | 67.5  | Scotland | 58.04, -4.06191    |
| Kilgallioch          | 48WSTN0000KLGLWM  | 239   | Scotland | 55.05, -4.76746    |
| Lochluichart         | 48WSTN0000LCCLTWH | 69    | Scotland | 57.69554, -4.79523 |
| Mark Hill            | 48WSTN0000MKHLWB  | 56    | Scotland | 55.12998, -4.74805 |

|                  |                  |       |          |                    |
|------------------|------------------|-------|----------|--------------------|
| Millennium       | 48WSTN0000MILWW9 | 65    | Scotland | 57.12364, -4.84852 |
| Race Bank        | 48WSTN0000RCBKOV | 573   | England  | 53.276, 0.841      |
| Rampion          | 48WSTN0000RMPNON | 400   | England  | 50.78424, 0.0558   |
| Robin Rigg East  | 48WSTN00000RREWF | 90    | Scotland | 54.75, -3.71885    |
| Robin Rigg West  | 48WSTN00000RRWWZ | 90    | Scotland | 54.75, -3.71885    |
| Strathy North    | 48WSTN0000STRNWW | 66    | Scotland | 58.38525, -3.89385 |
| Stronelairg      | 48WSTN0000STLGW3 | 227.7 | Scotland | 57.27414, -4.64176 |
| Walney 1 & 2     | 48WSTN0000WLNYWV | 368   | England  | 54.044, -3.522     |
| Walney 3         | 48WSTN0000WLNY3F | 330   | England  | 54.044, -3.52418   |
| Walney 4         | 48WSTN0000WLNY4D | 329   | England  | 54.044, -3.52418   |
| Westermost Rough | 48WSTN0000WTMSOT | 210   | England  | 53.805, 0.14681    |
| Whitelee         | 48WSTN1000WHILWQ | 322   | Scotland | 55.7125, -4.34111  |

**Table S1:** Wind farm EIC, capacity (MW), and location data. Offshore wind farms are included in the nearest onshore country.

## A.2 Background Factors for Returns

The returns for the ESS attachments are shown in Figure S1.

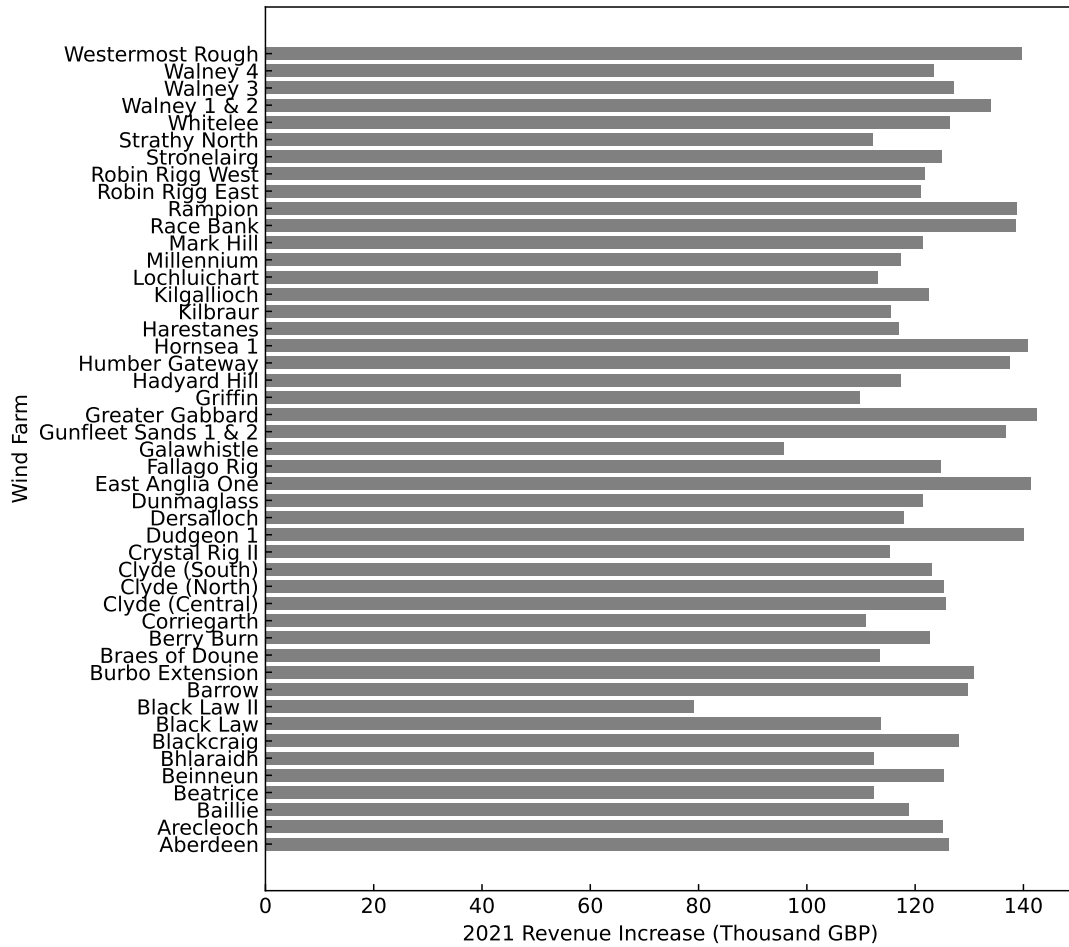

**Figure S1:** 2021 revenue increases modelled for an ESS attachment at various wind farm sites.

Type, and geospatial factors may also be considered alongside these paybacks. With respect to curtailment, onshore vs offshore, and Scottish vs English/Welsh comparisons are identified [1]. These are also interrelated, with Scotland having more onshore capacity, and England/Wales having more offshore capacity.

With respect to outputs themselves, onshore vs offshore distinctions are also significant, with offshore wind experiencing more consistent wind conditions and having a higher average capacity factor. Using 2019 BEIS (UK) data, a University of Oxford study notes offshore wind farms as having an average capacity factor of 39.6%, compared to 26.2% for onshore sites [2]. 2021 capacity factors are listed for specific farms in Figure S2. Here, higher capacity factors are broadly seen for English/Welsh offshore wind farms in particular.

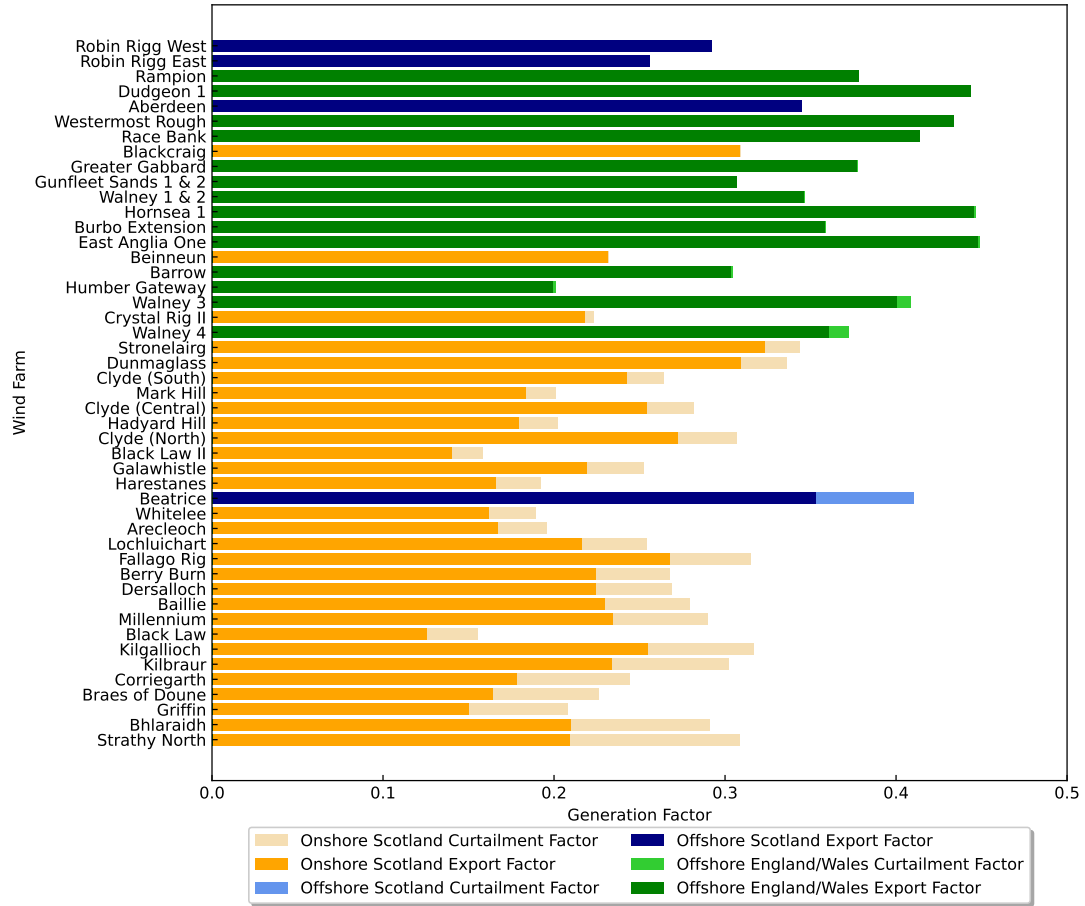

**Figure S2:** UK wind farm capacity factors (with and without curtailed energy, such that:  $EnergyGenerated = EnergyExported + EnergyCurtailed$ ). No On-shore England/Wales wind farms are considered in this paper.

These factors will therefore be included in the main document’s analysis.

### A.3 Emissions Intensity by Site

The main document determines the emissions intensity of the imbalance market (which an ESS attachment would likely export into and where the energy spot price is determined for the grid). To estimate the emissions offset from reduced curtailment by an ESS attachment an estimate of the emissions intensity of the market is useful. More detail, however, may be provided by determining an emissions intensity on a site by site basis.

The mix of marginal generation technologies is used to determine the emissions intensity of marginal generation for each site individually. Table S2 displays these figures.

**Table S2:** Marginal seller type during wind farm (with ESS attachment) export to grid (percentage), and associated emissions intensity  $kgCO_2/MWh$ .

| Farm Name            | Gas % | Coal % | Hydro % | Wind % | Emissions <i>kgCO<sub>2</sub>/MWh</i> |
|----------------------|-------|--------|---------|--------|---------------------------------------|
| Aberdeen             | 83.57 | 4.41   | 11.47   | 0.54   | 370.64                                |
| Arecleoch            | 83.13 | 4.55   | 11.92   | 0.4    | 370.16                                |
| Baillie              | 84.14 | 4.35   | 11.14   | 0.37   | 372.27                                |
| Beatrice             | 83.31 | 4.68   | 11.59   | 0.42   | 372.09                                |
| Beinneun             | 83    | 4.61   | 11.87   | 0.52   | 370.2                                 |
| Bhlaraidh            | 82.87 | 5.01   | 11.92   | 0.2    | 373.44                                |
| Blackcraig           | 83.83 | 4.18   | 11.45   | 0.53   | 369.49                                |
| Black Law            | 82.23 | 5.22   | 12.2    | 0.35   | 372.88                                |
| Black Law II         | 83.09 | 4.99   | 11.53   | 0.4    | 374.08                                |
| Barrow               | 83.79 | 3.97   | 11.75   | 0.49   | 367.35                                |
| Burbo Extension      | 83.29 | 4.49   | 11.7    | 0.52   | 370.21                                |
| Braes of Doune       | 83.26 | 4.98   | 11.42   | 0.34   | 374.72                                |
| Berry Burn           | 83.61 | 4.6    | 11.47   | 0.32   | 372.55                                |
| Corriegarth          | 82.99 | 4.82   | 11.85   | 0.34   | 372.15                                |
| Clyde (Central)      | 83.63 | 4.56   | 11.45   | 0.36   | 372.21                                |
| Clyde (North)        | 83.4  | 4.56   | 11.76   | 0.27   | 371.35                                |
| Clyde (South)        | 83.68 | 4.42   | 11.5    | 0.4    | 371.11                                |
| Crystal Rig II       | 84.23 | 3.91   | 11.44   | 0.42   | 368.48                                |
| Dudgeon 1            | 83.91 | 4.35   | 11.26   | 0.48   | 371.36                                |
| Dersalloch           | 82.69 | 4.92   | 12.07   | 0.32   | 371.92                                |
| Dunmaglass           | 83.93 | 4.25   | 11.39   | 0.43   | 370.51                                |
| East Anglia One      | 83.72 | 4.42   | 11.42   | 0.45   | 371.26                                |
| Fallago Rig          | 83.78 | 4.55   | 11.37   | 0.3    | 372.7                                 |
| Galawhistle          | 83.29 | 4.72   | 11.63   | 0.36   | 372.42                                |
| Gunfleet Sands 1 & 2 | 83.63 | 4.28   | 11.59   | 0.51   | 369.56                                |
| Greater Gabbard      | 83.6  | 4.52   | 11.41   | 0.47   | 371.74                                |
| Griffin              | 83.01 | 4.6    | 12.08   | 0.31   | 370.18                                |
| Hadyard Hill         | 83.58 | 4.43   | 11.7    | 0.29   | 370.79                                |
| Humber Gateway       | 83.98 | 4.4    | 11.12   | 0.5    | 372.15                                |
| Hornsea 1            | 83.75 | 4.55   | 11.28   | 0.43   | 372.59                                |
| Harestanes           | 83.22 | 4.29   | 12.03   | 0.46   | 368.04                                |
| Kilbraur             | 83.14 | 4.69   | 11.72   | 0.45   | 371.56                                |
| Kilgallioch          | 83.58 | 4.61   | 11.63   | 0.19   | 372.47                                |
| Lochluichart         | 83.72 | 4.37   | 11.58   | 0.33   | 370.78                                |
| Millennium           | 83.39 | 4.67   | 11.52   | 0.42   | 372.33                                |
| Mark Hill            | 83.27 | 4.34   | 11.87   | 0.51   | 368.78                                |
| Race Bank            | 84.08 | 4.25   | 11.17   | 0.49   | 371.13                                |
| Rampion              | 83.37 | 4.42   | 11.72   | 0.49   | 369.86                                |
| Robin Rigg East      | 83.1  | 3.98   | 12.35   | 0.57   | 364.7                                 |
| Robin Rigg West      | 83.3  | 3.93   | 12.2    | 0.57   | 365.04                                |
| Stronelairg          | 83.68 | 4.46   | 11.5    | 0.36   | 371.49                                |

|                  |       |      |       |      |        |
|------------------|-------|------|-------|------|--------|
| Strathy North    | 83.05 | 4.6  | 12.12 | 0.23 | 370.28 |
| Whitelee         | 83.19 | 4.67 | 11.77 | 0.37 | 371.54 |
| Walney 1 & 2     | 83.87 | 3.97 | 11.66 | 0.5  | 367.65 |
| Walney 3         | 83.85 | 4.11 | 11.57 | 0.46 | 368.88 |
| Walney 4         | 84.09 | 4.09 | 11.33 | 0.49 | 369.65 |
| Westermost Rough | 84.13 | 4.4  | 10.99 | 0.49 | 372.69 |

Table S2 notes the marginal seller type during periods of site export due to the ESS attachment (i.e. periods where the ESS exports energy into the grid). While the main document also (used for later analysis) notes this breakdown, the figures themselves are provided here for further detail.

Finally, while this paper considers generation side emissions, upstream emissions may also be of interest. Numerous studies investigate the topic of fugitive (carbon dioxide and methane) upstream emissions for coal and gas [3–5]. As upstream adjustment factors vary, some example adjustments of 20%, 30%, and 40% are shown in Table S3.

**Table S3:** *Emissions factors of wind farms (kgCO<sub>2</sub>/MWh). Scaled for increased upstream emissions.*

| Farm Name       | Base   | +20%   | +30%   | +40%   |
|-----------------|--------|--------|--------|--------|
| Aberdeen        | 370.64 | 444.77 | 481.83 | 518.9  |
| Arecleoch       | 370.16 | 444.19 | 481.21 | 518.22 |
| Baillie         | 372.27 | 446.72 | 483.95 | 521.18 |
| Beatrice        | 372.09 | 446.51 | 483.72 | 520.93 |
| Beinneun        | 370.2  | 444.24 | 481.26 | 518.28 |
| Bhlaraidh       | 373.44 | 448.13 | 485.47 | 522.82 |
| Blackcraig      | 369.49 | 443.39 | 480.34 | 517.29 |
| Black Law       | 372.88 | 447.46 | 484.74 | 522.03 |
| Black Law II    | 374.08 | 448.9  | 486.3  | 523.71 |
| Barrow          | 367.35 | 440.82 | 477.56 | 514.29 |
| Burbo Extension | 370.21 | 444.25 | 481.27 | 518.29 |
| Braes of Doune  | 374.72 | 449.66 | 487.14 | 524.61 |
| Berry Burn      | 372.55 | 447.06 | 484.32 | 521.57 |
| Corriegarth     | 372.15 | 446.58 | 483.8  | 521.01 |
| Clyde (Central) | 372.21 | 446.65 | 483.87 | 521.09 |
| Clyde (North)   | 371.35 | 445.62 | 482.76 | 519.89 |
| Clyde (South)   | 371.11 | 445.33 | 482.44 | 519.55 |
| Crystal Rig II  | 368.48 | 442.18 | 479.02 | 515.87 |
| Dudgeon 1       | 371.36 | 445.63 | 482.77 | 519.9  |
| Dersalloch      | 371.92 | 446.3  | 483.5  | 520.69 |
| Dunmaglass      | 370.51 | 444.61 | 481.66 | 518.71 |
| East Anglia One | 371.26 | 445.51 | 482.64 | 519.76 |
| Fallago Rig     | 372.7  | 447.24 | 484.51 | 521.78 |



|                      |        |        |        |        |
|----------------------|--------|--------|--------|--------|
| Galawhistle          | 372.42 | 446.9  | 484.15 | 521.39 |
| Gunfleet Sands 1 & 2 | 369.56 | 443.47 | 480.43 | 517.38 |
| Greater Gabbard      | 371.74 | 446.09 | 483.26 | 520.44 |
| Griffin              | 370.18 | 444.22 | 481.23 | 518.25 |
| Hadyard Hill         | 370.79 | 444.95 | 482.03 | 519.11 |
| Humber Gateway       | 372.15 | 446.58 | 483.8  | 521.01 |
| Hornsea 1            | 372.59 | 447.11 | 484.37 | 521.63 |
| Harestanes           | 368.04 | 441.65 | 478.45 | 515.26 |
| Kilbraur             | 371.56 | 445.87 | 483.03 | 520.18 |
| Kilgallioch          | 372.47 | 446.96 | 484.21 | 521.46 |
| Lochluichart         | 370.78 | 444.94 | 482.01 | 519.09 |
| Millennium           | 372.33 | 446.8  | 484.03 | 521.26 |
| Mark Hill            | 368.78 | 442.54 | 479.41 | 516.29 |
| Race Bank            | 371.13 | 445.36 | 482.47 | 519.58 |
| Rampion              | 369.86 | 443.83 | 480.82 | 517.8  |
| Robin Rigg East      | 364.7  | 437.64 | 474.11 | 510.58 |
| Robin Rigg West      | 365.04 | 438.05 | 474.55 | 511.06 |
| Stronelaig           | 371.49 | 445.79 | 482.94 | 520.09 |
| Strathy North        | 370.28 | 444.34 | 481.36 | 518.39 |
| Whitelee             | 371.54 | 445.85 | 483    | 520.16 |
| Walney 1 & 2         | 367.65 | 441.18 | 477.95 | 514.71 |
| Walney 3             | 368.88 | 442.66 | 479.54 | 516.43 |
| Walney 4             | 369.65 | 443.58 | 480.55 | 517.51 |
| Westermost Rough     | 372.69 | 447.23 | 484.5  | 521.77 |

## A.4 Example Run

This paper models the performance of multiple ESSs over a full year with a half-hourly time resolution. To further understand the operation of this algorithm in practice an example run is herein provided. To further demonstrate the functionality of the model, some features are deliberately exaggerated to make these points more apparent.

Firstly, a 90% loss is used for charging as well as discharging (each), so more clearly show how the model accounts for inefficiency. In practice, a loss of this magnitude would not be consistent with the efficiency provided in the literature, but by doing so in the example run, losses from inefficiency are made more apparent for the reader.

Secondly, a low level of wind output is selected. This is to show how the ESS is constrained to charged from the output of the wind farm as the inflow can be seen to never exceed the wind generation level.

Thirdly, a rating of 1 C is used to create more times in which this constraint is invoked and therefore can be seen.

Finally, a minimum and maximum state of charge of 0% and 100% are defined to simplify the output results.

The prices throughout the sample day are as follows:

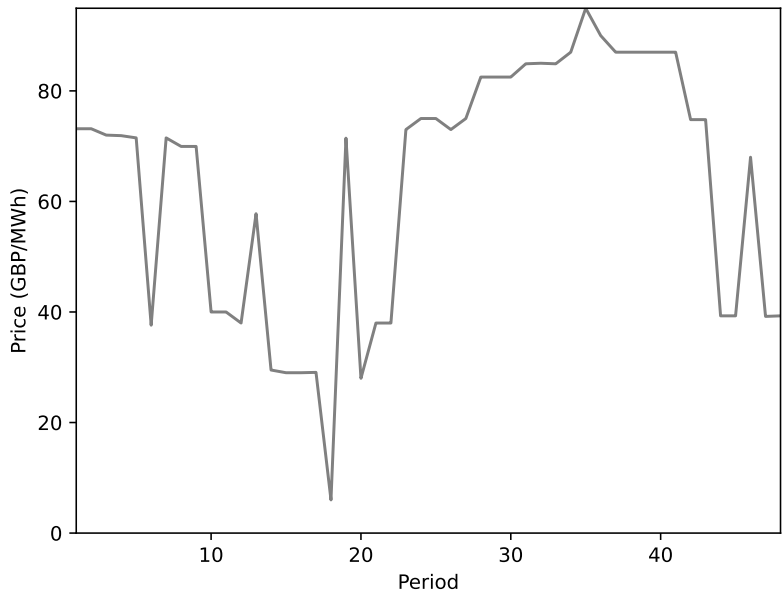

**Figure S3:** *Energy prices throughout the example run day.*

The energy generation from the wind farm, and inflows to the ESS are as follows:

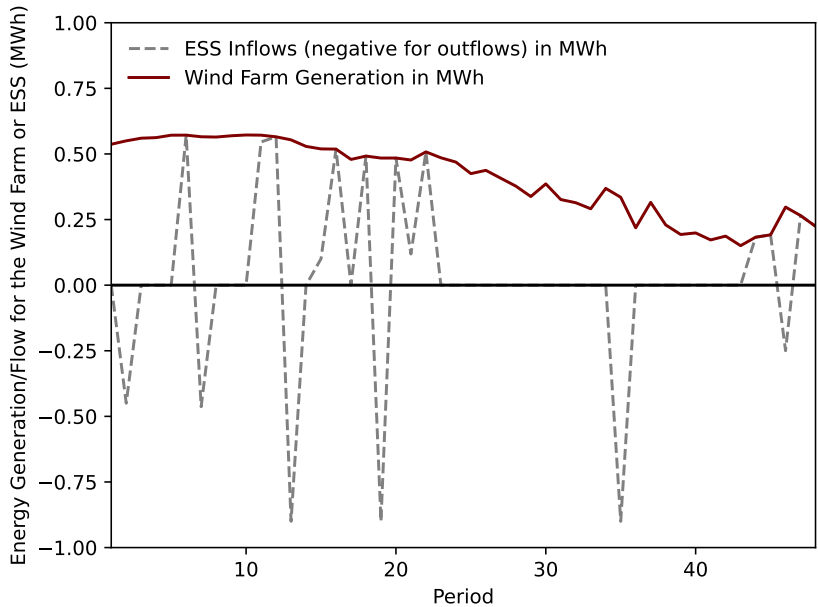

**Figure S4:** *Energy flows throughout the example run day.*

Finally, the state of charge of the battery was as follows:

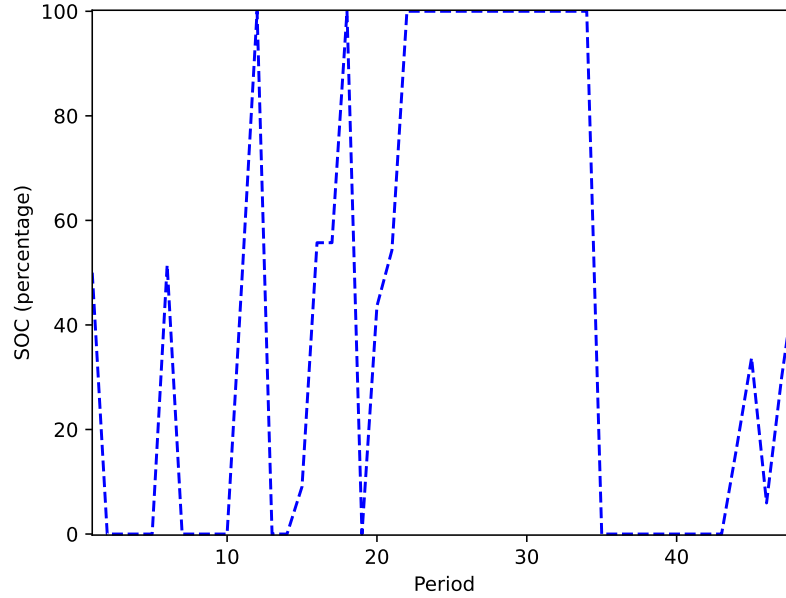

**Figure S5:** *ESS SOC throughout the example run day.*

In Figure S3 it can be seen how the energy price fluctuates throughout the day (which as per BMRS convention is divided into 48 half-hourly periods). Here the price can be seen to fluctuate significantly, with a dip in the early morning (where there is low demand), and peak in the evening (coinciding with peak demand).

Figure S4 notes the generation of the wind farm, and the inflows into the ESS. Inflows are taken to be positive such that it may be observed that inflows never exceed wind farm generation, as the co-located ESS can only charge using energy generated by the wind farm. Due to this constraint the ESS never charges at its full rate, but it can be seen to discharge as such (subject to inefficiency losses).

It may be seen to operating consistently during the period of morning volatility to capitalise on the numerous charging and discharging opportunities. In the evening, however, where such opportunities do not present themselves, the ESS may be seen waiting for the price maximum in the 36th period where it exports. Figure S5 also displays this behaviour, but with respect to the state of charge rather than energy flows.

## A.5 Further Curtailment Details

While curtailment is already discussed in the main paper, and in Appendix A.2, given its significance in contributing to ESS emissions reductions, further details are included here. This curtailment serves as a direct source of ESS emissions reductions and therefore warrants further examination.

### A.5.1 Geographic Breakdown

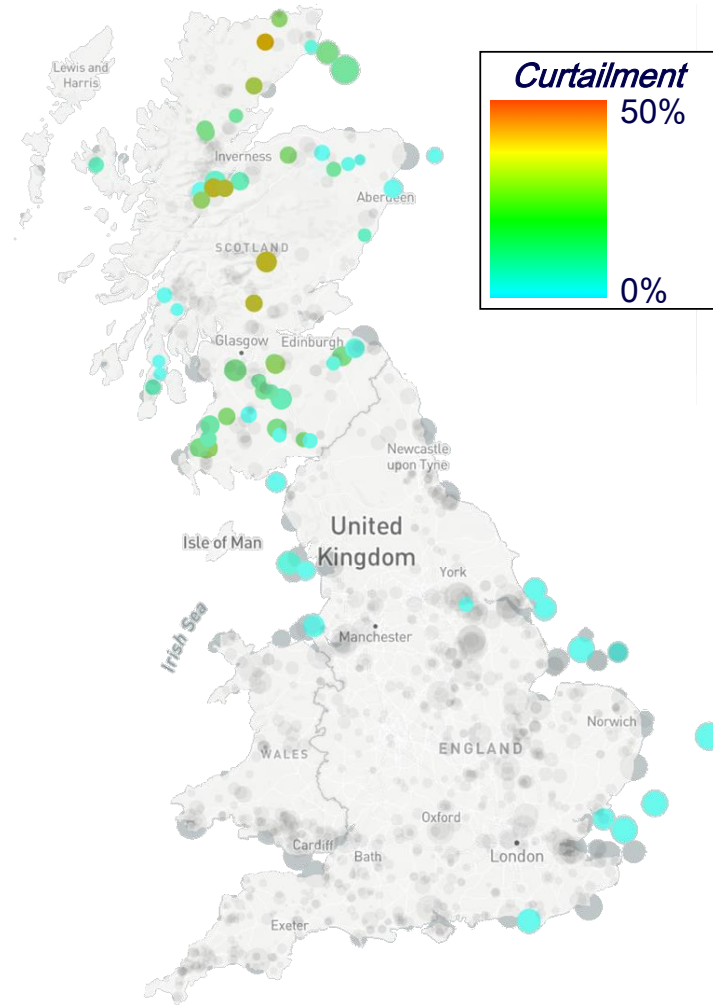

**Figure S6:** Britain's 2021 wind energy curtailment for mapped BMRS reporting wind farms. Colour scale notes percentage curtailment. Circle area scaled up by capacity. Black dots represent other generators for context, including wind farms for which curtailment data was not available.

These curtailment rates may be observed geo-spatially for each site, as can be seen in Figure S6. The curtailment volumes have been increasing alongside the expansion of VRE in the grid, while remaining persistent even in proportional terms. Figure S7 displays a further breakdown of generated, exported, and curtailed energy by site, as well as noting the typical export price for each wind farm. These results further emphasise the greater rate of Scottish wind farm curtailment, and higher capacity factors (including more persistent rates of generation) of predominantly offshore English/Welsh farms.

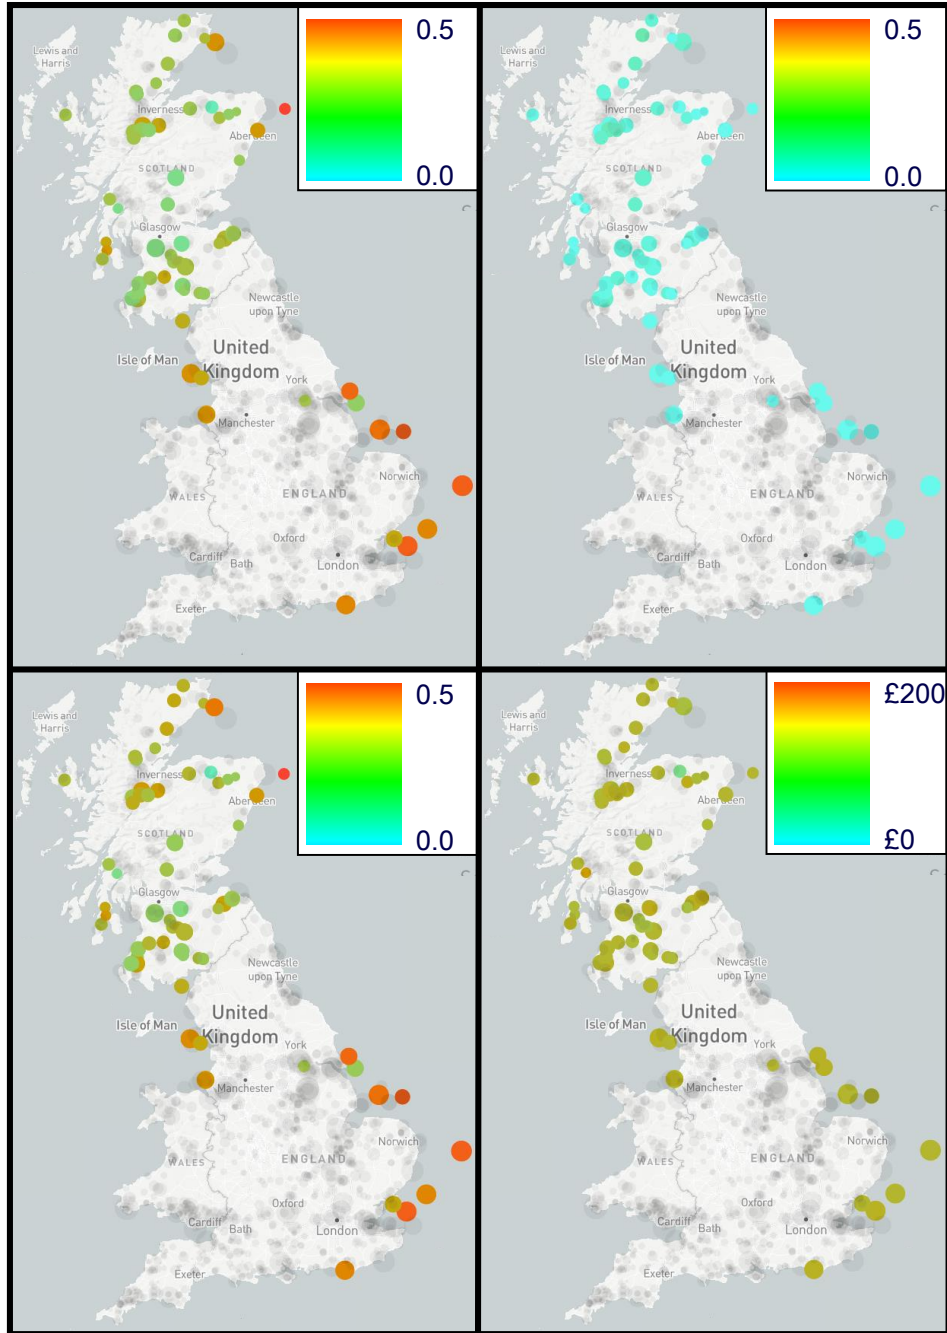

**Figure S7:** *Top Left: Export Factor (hourly energy exported / capacity).  
Top Right: Curtailment Factor (hourly energy curtailed / capacity).  
Bottom Left: Generation Factor (hourly energy generated / capacity, i.e. The summed Export Factor and Curtailment Factor).  
Bottom Right: Average spot price of energy exported (GBP / MWh).  
Black dots represent other generators for context, including wind farms for which curtailment data was not available.*

### A.5.2 Curtailment Methodology

Different sources have used differing methods to estimate curtailment rates of British wind farms. As curtailment rates may not be known or reported for all wind farms, some studies will calculate the curtailment rate using individual sites for which this information is known. Other studies instead compare national curtailment and wind generation figures to obtain a curtailment measure, which includes generation from all wind farms - though this includes generation from farms without reported rates of curtailment. The figures used from BMRS fall within range of the curtailment rates reported by other studies.

**Table S4:** *British Annual Wind Energy Curtailment (% of total wind energy generated). As per Imperial College London (ICL) [1], Wind Europe [6], Kyoto University [7], the University of Strathclyde [8], and by this paper's results [9–11]. Note that data is not provided or obtained for all years from all sources/papers. This table expands upon the literature overview's source comparison, by including in this investigation's rates of curtailment.*

| Year | ICL  | Wind Europe | Kyoto | Strathclyde | BMRS |
|------|------|-------------|-------|-------------|------|
| 2012 | 0.44 | 0.4         |       |             |      |
| 2013 | 2.39 | 2           |       |             |      |
| 2014 | 3.58 | 3.1         | 2     | 2.8         |      |
| 2015 | 5.68 |             | 0.7   | 4.2         |      |
| 2016 | 5.64 |             | 2.9   | 4           |      |
| 2017 |      |             | 2.9   | 4           | 3.79 |
| 2018 |      |             | 2.6   | 3.9         | 3.98 |
| 2019 |      |             | 3     |             | 4.28 |
| 2020 |      |             | 4.2   |             | 6.45 |
| 2021 |      |             |       |             | 4.46 |

### A.5.3 Annual Curtailment Changes

Finally, these results may also be aggregated for Scotland and England/Wales for each year.

**Table S5:** *Site aggregated curtailment data for Scotland and England/Wales.*

| Year                            | 2017  | 2018  | 2019  | 2020  | 2021  |
|---------------------------------|-------|-------|-------|-------|-------|
| Curtailed GWh: Scotland         | 1256  | 1385  | 1631  | 2959  | 1840  |
| Curtailed GWh: England/Wales    | 17    | 22    | 34    | 104   | 91    |
| Exported GWh: Scotland          | 6098  | 7316  | 12223 | 12394 | 11763 |
| Exported GWh: England/Wales     | 6865  | 12115 | 16189 | 22322 | 20254 |
| % Curtailment: Scotland         | 17.07 | 15.92 | 11.77 | 19.27 | 13.53 |
| % Curtailment: England/Wales    | 0.24  | 0.18  | 0.21  | 0.47  | 0.45  |
| % of Curtailments from Scotland | 98.68 | 98.45 | 97.96 | 96.59 | 95.30 |

Table S5 displays the divide between Scottish and English/Welsh curtailment levels by aggregating the data from specific mapped sites from BMRS. More broadly, the disproportionate expansion of offshore wind in England/Wales is especially evident; motivated by trends such as those above.

Future investigations should be keenly aware of changes in these curtailment rates by region, as they strongly effect the performance of ESS attachments and potential emissions reductions through the export of otherwise curtailed energy.

## References

- [1] Michael Joos and Iain Staffell. Short-term integration costs of variable renewable energy: Wind curtailment and balancing in Britain and Germany. *Renewable and Sustainable Energy Reviews*, 86:45–65, 2018. doi:10.1016/j.rser.2018.01.009.
- [2] Panit Potisomporn and Christopher Vogel. Spatial and temporal variability characteristics of offshore wind energy in the United Kingdom. *Wind Energy*, 25:537–552, 2021. doi:10.1002/we.2685.
- [3] Joel Foramitti, Ivan Savin, and Jeroen C.J.M. van den Bergh. Regulation at the source? comparing upstream and downstream climate policies. *Technological Forecasting and Social Change*, 172, 2021. doi:10.1016/j.techfore.2021.121060.
- [4] Richard Heede and Naomi Oreskes. Potential emissions of co2 and methane from proved reserves of fossil fuels: An alternative analysis. *Global Environmental Change*, 36:12–20, 2016. doi:10.1016/j.gloenvcha.2015.10.005.
- [5] Ke Wang, Jianjun Zhang, Bofeng Cai, and Shengmin Yu. Emission factors of fugitive methane from underground coal mines in china: Estimation and uncertainty. *Applied Energy*, 250:273–282, 2019. doi:10.1016/j.apenergy.2019.05.024.
- [6] Wind Europe. Windeurope views on curtailment of wind power and its links to priority dispatch, 2016. URL <https://windeurope.org/wp-content/uploads/files/policy/position-papers/WindEurope-Priority-Dispatch-and-Curtailment.pdf>. Accessed 12 July 2022.
- [7] Yoh Yasuda, Lori Bird, Enrico Maria Carlini, Peter Børre Eriksen, Ana Estanqueiro, Damian Flynn, Daniel Fraile, Emilio Gómez Lázaro, Sergio Martín-Martínez, Daisuke Hayashi, Hannele Holttinen, Debra Lew, John McCam, Nickie Menemelis, Raul Miranda, Antje Orths, J. Charles Smith, Emanuele Taibi, and Til Kristian Vrana. C-e (curtailment – energy share) map: An objective and quantitative measure to evaluate wind and solar curtailment. *Renewable and Sustainable Energy Reviews*, 160, 2022. doi:10.1016/j.rser.2022.112212.
- [8] Calum Edmunds, Sergio Martin-Martinez, Jethro Browell, Emilio Gomez-Lazaro, and Stuart Galloway. On the participation of wind energy in response and reserve markets in Great Britain and Spain. *Renewable and Sustainable Energy Reviews*, 115, 2019. doi:10.1016/j.rser.2019.109360.

- [9] BMRS, ELEXON, NationalGridESO. Actual aggregated generation per type, 2022. URL <https://www.bmreports.com/bmrs/?q=actgeneration/actualaggregated>. Accessed 18 April 2022.
- [10] Renewable Energy Foundation. Balancing mechanism wind farm constraint payments, 2022. URL <https://www.ref.org.uk/constraints/indexbymth.php>. Accessed 21 July 2022.
- [11] Renewable Energy Foundation. Energy data, 2022. URL <https://www.ref.org.uk/energy-data>. Accessed 20 June 2022.
